# Supplementary material
Source: HighWire-hosted journal article supplement (https://erj.ersjournals.com/content/55/1/1901333)
Supplement: inline-supplementary-material-1 [file inline-supplementary-material-1.pdf]

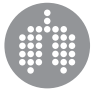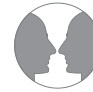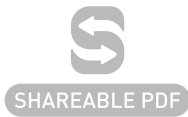

# Anti-IL5 and anti-IL5R $\alpha$ therapy for clinically significant bronchiectasis with eosinophilic endotype: a case series

Jessica Rademacher<sup>1,2</sup>, Stefanie Konwert<sup>1</sup>, Jan Fuge <sup>2</sup>, Sabine Dettmer<sup>2,3</sup>, Tobias Welte<sup>1,2</sup> and Felix C. Ringshausen <sup>1,2</sup>

**Affiliations:** <sup>1</sup>Dept of Respiratory Medicine, Hannover Medical School, Hannover, Germany. <sup>2</sup>Biomedical Research in Endstage and Obstructive Lung Disease Hannover (BREATH), German Center for Lung Research (DZL), Hannover, Germany. <sup>3</sup>Dept of Diagnostic and Interventional Radiology, Hannover Medical School, Hannover, Germany.

**Correspondence:** Jessica Rademacher, Dept of Respiratory Medicine, Hannover Medical School, Carl-Neuberg-Strasse 1, 30625 Hannover, Germany. E-mail: rademacher.jessica@mh-hannover.de

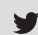

@ERSpublications

**Patients with clinically significant bronchiectasis featuring an eosinophilic inflammatory endotype who were treated with add-on mepolizumab or benralizumab showed a significant improvement of FEV<sub>1</sub>, symptom burden and quality of life** <http://bit.ly/2AZvBLm>

**Cite this article as:** Rademacher J, Konwert S, Fuge J, *et al.* Anti-IL5 and anti-IL5R $\alpha$  therapy for clinically significant bronchiectasis with eosinophilic endotype: a case series. *Eur Respir J* 2020; 55: 1901333 [<https://doi.org/10.1183/13993003.01333-2019>].

This single-page version can be shared freely online.

## *To the Editor:*

Bronchiectasis is a chronic and often progressive disease, which frequently is associated with significant symptom burden, requiring intensive treatment. Regardless of the multiple potential underlying aetiologies, the vicious cycle of airway inflammation, structural airway damage, impaired mucus clearance and airway pathogen acquisition is the crucial pathogenic pathway for the progression of disease [1].
